# Supplementary material for: Apurinic endonuclease 1 promotes the cisplatin resistance of lung cancer cells by inducing Parkin-mediated mitophagy
Source: PubMed Central journal article supplement — Oncol Rep. 2019 Oct 1;42(6):2245–54. doi: 10.3892/or.2019.7345 (PMC6826301; doi:10.3892/or.2019.7345), 2019-10-01

Figure S1. The transfection efficiency was detected by qPCR. (A) A549 cells were transfected with vectors containing Mia40 overexpression plasmid as indicated. The transfection efficiency was detected by qPCR. \*\*\* $P < 0.001$ , vs. the vector group. (B) A549 cells were transfected with small interfering RNA (si-Parkin or si-NC) and the transfection efficiency was assessed by qPCR. \*\* $P < 0.01$ , vs. the NC group.

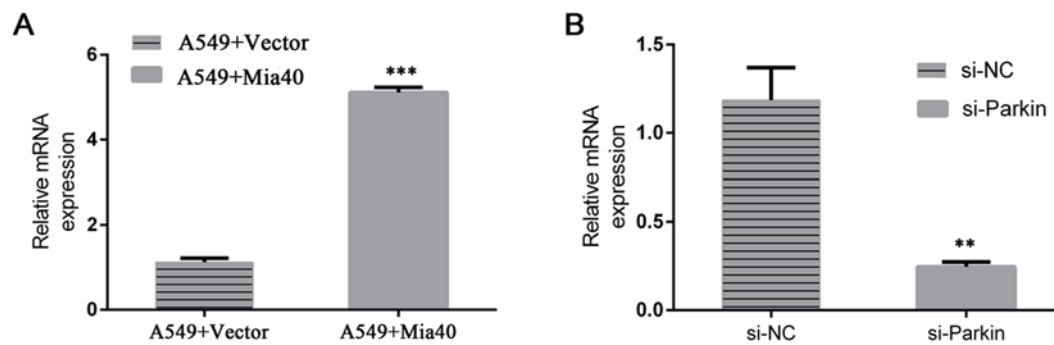

Supplement: Supplementary_Data.pdf [file Supplementary_Data.pdf]
